# Supplementary material
Source: publisher site journal article supplement (https://www.dovepress.com/article/208712)
Supplement: Supplementary file 1 [file get_supplementary_file.php]

**Supplemental Figure**

**Figure S1** tnAcity study design.


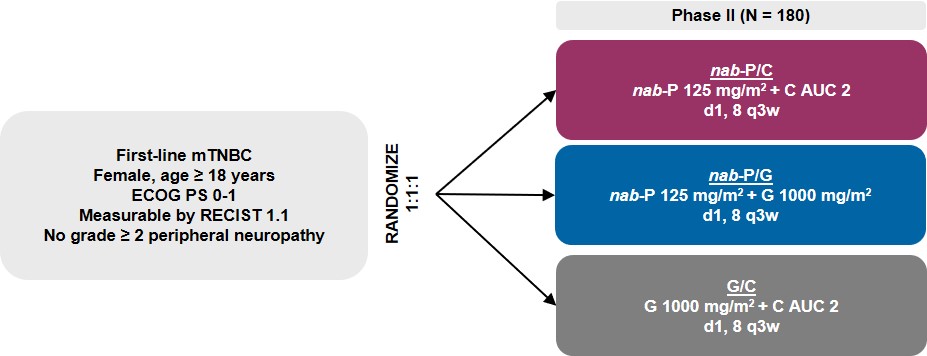


**Abbreviations:** AUC, area under the curve; C, carboplatin; d, day; ECOG PS, Eastern Cooperative Oncology Group performance status; G, gemcitabine;mTNBC, metastatic triple-negative breast cancer; *nab*-P, *nab*-paclitaxel; q3w, every 3 weeks; RECIST 1.1, Response Evaluation Criteria In Solid Tumors version 1.1.

**Supplemental Tables**

**Table S1** List of independent ethics committee/ institutional review board sites

| **No.** | **Name/Address of IEC/IRB** |
| --- | --- |
| 1 | Peninsula Health Human Research Ethics Committee  Hastings Road 3199  Victoria, AUSTRALIA |
| 2 | Medizinische Universitat Wien Universitätsklinik für Innere Medizin I - Abteilung für Onkologie  Waehringer Guertel 18 – 20  1090 Vienna, AUSTRIA |
| 3 | Comitê de Ética em Pequisa em Seres Humanos da Faculdade de Medicina de São José do Rio Preto – FAMERP/SP  São José Do Rio Preto, SP 15090-000, BRAZIL |
| 4 | Comitê de Ética em Pequisa da Pontificia Universidade Católica do Rio Grande do Sul – PUCRS  Avenida Ipiranga 6681  Porto Alegre, RS 90619-900, BRAZIL |
| 5 | Comitê de Ética em Pesquisa em Seres Humanos da Liga Paranaense de Combate ao Câncer – Hospital Erasto Gaertner  Rua Doutor Ovande do Amaral 201  Curitiba, PR 81520-060, BRAZIL |
| 6 | Comitê de Ética em Pesquisa em Seres Humanos do Hospital Sao Rafael/Monte Tambor/BA  Avenida São Rafael 2152, Bairro São Marcos  Salvador, BA 41256-900, BRAZIL |
| 7 | Comitê de Ética em Pesquisa em Seres Humanos do Centro Universitário – UNIVATES  Rua Benjamin Constant 881, Servico De Oncologia  Lajeado, RS 95900-000, BRAZIL |
| 8 | Comitê de Ética em Pesquisa em Seres Humanos do Hospital das Clinicas da Faculdade de medicina de Ribeirão Preto/USP  Avenida Bandeirantes 3900, Campus Universitário  Ribeirão Preto, SP 14048-900, BRAZIL |
| 9 | Comitê de Ética em Pesquisa em Seres Humanos do Instituto Nacional do Cancer – INCA  Rua Visconde De Santa Isabel, Vila Isabel, No. 274  Rio De Janeiro, RJ 20560120, BRAZIL |
| 10 | Comitê de Ética em Pesquisa do Instituto de Educação e Pesquisa da Associação Hospitalar Moinhos de Vento  Rua Ramiro Barcelos 910, Bloco D  Porto Alegre, RS 90035-001, BRAZIL |
| 11 | Comitê de Ética em Pesquisa em Seres Humanos da Universidade de Ribeirão Preto – UNAERP  Av. Costabile Romano 2201  Ribeirão Preto, SP 14096-900, BRAZIL |
| 12 | Comitê de Ética em Pesquisa em Seres Humanos do Instituto Brasileiro de Controle de Cancer – IBCC  Av. Alcantra Machado 2576  São Paulo, SP 03102-002, BRAZIL |
| 13 | Comite de Ética em Pesquisa em Seres Humanos da Fundação Hospital Amaral Carvalho SP  Rua Das Palmeiras 89  Jaú, SP 17210-120, BRAZIL |
| 14 | Comitê de Ética em Pesquisa em Seres Humanos da Fundação Pio XII - Hospital de Cancer de Barretos  Rua Antenor Duarte Villela 1331  Barretos, SP 14784-400, BRAZIL |
| 15 | Comitê de Ética em Pesquisa em Seres Humanos "Hospital Sírio Libanês"  Rua Peixoto Gomide 316 7° andar  São Paulo, SP, BRAZIL |
| 16 | Comite d'evaluation scientifique et d'ethique de la recherche  Pavillon R, 900 Rue Saint-Denis, 2e etage  Montreal, QC H2X 0A9, CANADA |
| 17 | University of Saskatchewan Biomedical Research Ethics Board  110 Gymnasium Road, Box 5000  Saskatoon, SK S7N 0W8, CANADA |
| 18 | Ottawa Hospital Research Ethics Board  725 Parkdale Avenue Ontario  Ottawa, ON K1Y 4E9, CANADA |
| 19 | Ethikkommission der Medizinischen Fakultat Heidelberg  Alte Glockengießerei 11/1  Heidelberg, 69115, GERMANY |
| 20 | National Ethics Committee  Mesogion Avenue 284  Athens, Attiki 15562, GREECE |
| 21 | Comitato Etico IRCCS Instituto Oncologico Veneto  Largo Rosanna Benzi 10  Genova, 16132, ITALY |
| 22 | CE Area Monza Brianza - Comitato Etico Azienda Ospedaliera S. Gererdo  Via Pergolesi 33  Monza, 20900, ITALY |
| 23 | Comitato Etico IRCCS Istituto Oncologico Veneto  Via Gattamelata 64  Padova, 16132, ITALY |
| 24 | Comitato Etico per la Sperimentazione Medicinali della AUSL 9 di Grosseto  Via Senese 161  Grosseto, 58100, ITALY |
| 25 | Comitato Etico provinciale di Reggio Emilia AO Arcispedale S Maria Nuova IRCCS  Viale Umberto I 50  Reggio Emilia, 42100, ITALY |
| 26 | Comitato Etico dell Universita’ Cattolica dell Sacro Cuore Policlinico Universitario Agostino Gemelli  Largo A. Gemelli 8  Roma, 00168, ITALY |
| 27 | Comitato Etico dell' Azienda Ospedaliera Ospedali Riuniti Papardo Piemonte Contrada Papardo  Via Di Grottarossa 1035-1039  Messina, 98158, ITALY |
| 28 | Comitato Etico IRCCS Istituti Fisioterapici Ospitalieri – CE IRCCS Lazio  Via Elio Chianesi 53  Roma, 00144, ITALY |
| 29 | Comitato Etico dell' IRCCS Istituto Nazionale per lo Studio e La Cura Dei Tomori Fondazione Giovanni Pascale  Via Mariano Semmola  Napoli, 80131, ITALY |
| 30 | Comitato Etico CE A.O. Citta della Salute e della Scienza di Torino  Corso Bramante 88  Torino, 10126, ITALY |
| 31 | Comitato Etico dell' Universita Sapienza – Azienda Ospedaliera Sant'Andre  Roma, 00189, ITALY |
| 32 | Comitato Etico della Provincia di Bergamo c/o A,O Papa Giovanni XXIII  Piazza OMC 1  Bergamo, 2412, ITALY |
| 33 | CEIC – Comissao de Etica para a Investigacao Clinica  Av. Do Brasil 53 - Pav.17-A  Lisboa, 1749-004, PORTUGAL |
| 34 | Comite Etico de Investigacion Clinica, Hospital Universitari vall d'Hebron  P. Vall d'Hebron 119-129  Barcelona, 08036, SPAIN |
| 35 | NRES Committee North West- Haydack,  4 Minshull Steet, Barlow House 3rd floor M1 3DZ  Manchester, UK |
| 36 | Schulman Associates IRB, Inc.  4445 Lake Forest Drive  Cincinnati, OH 45242, USA |
| 37 | Mary Washington Hospital Institutional Review Board  1300 Hospital Drive  Fredericksburg, VA 22401, USA |
| 38 | Quorum Review IRB  1501 Fourth Avenue  Seattle, WA 98101, USA |
| 39 | Henry Ford Health System Institutional Review Board  2799 West Grand Boulevard  Detroit, MI 48202, USA |
| 40 | UCSD Human Research Protections Program  9500 Gilman Drive  La Jolla, CA 92093, USA |
| 41 | University of Texas Health Science Center at Houston Committee for the Protection of Human Subjects (CHUP)  6410 Fannin Street  Houston, TX 77030, USA |
| 42 | New England Institutional Review Board  85 Wells Avenue  Newton, MA 2459, USA |
| 43 | Alamance Regional Medical Center Institutional Review Board  1240 Huffman Mill Road  Burlington, NC 27215, USA |
| 44 | Providence Health and Services IRB  5251 Northeast Gisan Street, 3rd Floor  Portland, OR 97213, USA |
| 45 | Western Institutional Review Board  1019 39th Ave SE  Puyallup, WA 98374, USA |
| 46 | University of Miami Institutional Review Board  1500 NW 12th Ave  Miami, FL 33136, USA |
| 47 | Human Research Protections Office (HRPO)  UMB BioPark 1  Baltimore, MD 21201, USA |
| 48 | US Oncology Inc. Institutional Review Board  10101 Woodloch Forests  The Woodlands, TX 77380, USA |
| 49 | St. Vincent Hospital Institutional Review Board  835 South Van Buren Street  Green Bay, WI 54301, UNITED STATES |
| 50 | Missouri Baptist Medical Center Institutional Review Board  3015 North Ballas Road  St. Louis, MO 63131, USA |
| 51 | NYU School of Medicine Institutional Review Board  1 Park Ave  New York, NY 10016, USA |
| 52 | Toledo Clinic, Inc. Institutional Review Board  4235 Secor Road  Toledo, OH 43623, USA |
| IEC, independent ethics committee; IRB, institutional review board | |

**Table S2** Description of circulating tumor cell thresholds

|  | **Baseline CTCs/7.5 mL** | | | **Postbaseline CTCs/7.5 mL** | | |
| --- | --- | --- | --- | --- | --- | --- |
| **Main Population**  **1-CTC Cutoff** | **2-CTC Cutoff** | **5-CTC Cutoff** | **Main Population 1-CTC Cutoff** | **2-CTC Cutoff** | **5-CTC Cutoff** |
| **Group 1 (+ + +)** | ≥ 1 CTC | ≥ 2 CTCs | ≥ 5 CTCs | ≥ 1 CTC | ≥ 2 CTCs | ≥ 5 CTCs |
| **Group 2 (+ ± ±)** | ≥ 1 CTC | ≥ 2 CTCs | ≥ 5 CTCs | 0 CTCs in ≥ 1 measurement | < 2 CTCs in ≥ 1 measurement | < 5 CTCs in ≥ 1 measurement |
| **Group 3 (−)** | 0 CTCs | < 2 CTCs | < 5 CTCs | 1-2 CTCs | < 2 CTCs | < 5 CTCs |
| **Abbreviation:** CTC, circulating tumor cell. | | | | | | |

**Table S3** Patient baseline characteristics in the analysis of ≥ 2 circulating tumor cells

| **Characteristic** | **Group 1 (+ + +) *n* = 16** | **Group 2 (+ ± ±) *n* = 44** | **Group 3 (−) *n* = 69** |
| --- | --- | --- | --- |
| Age, median (range), years | 53.0 (40-69) | 57.0 (27-73) | 56.0 (27-82) |
| < 65, n (%) | 10 (62.5) | 35 (79.5) | 46 (66.7) |
| ≥ 65, n (%) | 6 (37.5) | 9 (20.5) | 23 (33.3) |
| Baseline ECOG PS, n (%) |  |  |  |
| 0 | 9 (56.3) | 23 (52.3) | 46 (66.7) |
| 1 | 7 (43.8) | 21 (47.7) | 22 (31.9) |
| 2 | 0 | 0 | 1 (1.4) |
| Race, n (%) |  |  |  |
| White | 11 (68.8) | 41 (93.2) | 55 (79.7) |
| Black/African American | 3 (18.8) | 2 (4.5) | 9 (13.0) |
| Not collected or reported | 2 (12.5) | 1 (2.3) | 5 (7.2) |
| Region, n (%) |  |  |  |
| North America | 9 (56.3) | 26 (59.1) | 36 (52.2) |
| Western Europe | 7 (43.8) | 18 (40.9) | 32 (46.4) |
| Australia | 0 | 0 | 1 (1.4) |
| Disease-free interval, n (%) |  |  |  |
| ≤ 1 year | 6 (37.5) | 11 (25.0) | 16 (23.2) |
| > 1 year | 10 (62.5) | 32 (72.7) | 53 (76.8) |
| Triple negative at primary diagnosis, n (%) | 13 (81.3) | 33 (75.0) | 53 (76.8) |
| Site of metastasis, n (%) |  |  |  |
| Bone | 10 (62.5) | 19 (43.2) | 18 (26.1) |
| Breast | 5 (31.3) | 14 (31.8) | 13 (18.8) |
| Liver | 6 (37.5) | 16 (36.4) | 14 (20.3) |
| Lung/thoracic | 7 (43.8) | 28 (63.6) | 47 (68.1) |
| Lymph node(s) | 12 (75.0) | 36 (81.8) | 45 (65.2) |
| Skin/soft tissue | 4 (25.0) | 8 (18.2) | 13 (18.8) |
| Other | 4 (25.0) | 5 (11.4) | 14 (20.3) |
| Abdomen/peritoneal | 2 (12.5) | 0 | 2 (2.9) |
| Prior taxane treatment, n (%) | 12 (75.0) | 26 (59.1) | 43 (62.3) |
| **Abbreviations:** CTC, circulating tumor cell; ECOG PS, Eastern Cooperative Oncology Group performance status. | | | |

**Table S4** Patient baseline characteristics in the analysis of ≥ 5 circulating tumor cells

| **Characteristic** | **Group 1 (+ + +) *n* = 10** | **Group 2 (+ ± ±) *n* = 34** | **Group 3 (−) *n* = 87** |
| --- | --- | --- | --- |
| Age, median (range), years | 62.5 (40-69) | 55.5 (27-73) | 57.0 (27-82) |
| < 65, n (%) | 5 (50.0) | 27 (79.4) | 60 (69.0) |
| ≥ 65, n (%) | 5 (50.0) | 7 (20.6) | 27 (31.0) |
| Baseline ECOG PS, n (%) |  |  |  |
| 0 | 5 (50.0) | 19 (55.9) | 54 (62.1) |
| 1 | 5 (50.0) | 15 (44.1) | 32 (36.8) |
| 2 | 0 | 0 | 1 (1.1) |
| Race, n (%) |  |  |  |
| White | 7 (70.0) | 32 (94.1) | 70 (80.5) |
| Black/African American | 1 (10.0) | 2 (5.9) | 11 (12.6) |
| Not collected or reported | 2 (20.0) | 0 | 6 (6.9) |
| Region, n (%) |  |  |  |
| North America | 5 (50.0) | 21 (61.8) | 46 (52.9) |
| Western Europe | 5 (50.0) | 13 (38.2) | 40 (46.0) |
| Australia | 0 | 0 | 1 (1.1) |
| Disease-free interval, n (%) |  |  |  |
| ≤ 1 year | 3 (30.0) | 10 (29.4) | 21 (24.1) |
| > 1 year | 7 (70.0) | 24 (70.6) | 65 (74.7) |
| Triple negative at primary diagnosis, n (%) | 7 (70.0) | 30 (88.2) | 64 (73.6) |
| Site of metastasis, n (%) |  |  |  |
| Bone | 7 (70.0) | 18 (52.9) | 22 (25.3) |
| Breast | 5 (50.0) | 8 (23.5) | 20 (23.0) |
| Liver | 4 (40.0) | 15 (44.1) | 17 (19.5) |
| Lung/thoracic | 4 (40.0) | 21 (61.8) | 59 (67.8) |
| Lymph node(s) | 9 (90.0) | 30 (88.2) | 56 (64.4) |
| Skin/soft tissue | 2 (20.0) | 7 (20.6) | 16 (18.4) |
| Other | 2 (20.0) | 4 (11.8) | 17 (19.5) |
| Abdomen/peritoneal | 1 (10.0) | 1 (2.9) | 2 (2.3) |
| Prior taxane treatment, n (%) | 6 (60.0) | 21 (61.8) | 56 (64.4) |
| **Abbreviations:** CTC, circulating tumor cell; ECOG PS, Eastern Cooperative Oncology Group performance status. | | | |

**Table S5** Efficacy outcomes by change in circulating tumor cell (CTC) levels from baseline in the analyses of patients with CTC levels ≥ 2 and ≥ 5

| **Outcome** | **≥ 2-CTC Analysis** | | | **≥ 5-CTC Analysis** | | |
| --- | --- | --- | --- | --- | --- | --- |
| **Group 1 (+ + +)**  ***n* = 16** | **Group 2 (+ ± ±) *n* = 44** | **Group 3 (−) *n* = 69** | **Group 1 (+ + +) *n* = 10** | **Group 2 (+ ± ±) *n* = 34** | **Group 3 (−) *n* = 87** |
| ORR, n (%) | 5 (31.3) | 34 (77.3) | 33 (47.8) | 2 (20.0) | 28 (82.4) | 42 (48.3) |
| Median PFS, months | 4.70 | 8.94 | 6.02 | 4.70 | 8.38 | 6.51 |
| HR (95% CI)a | — | 0.315  (0.158-0.626) | 0.515  (0.273-0.973) | — | 0.337  (0.147-0.774) | 0.527  (0.248-1.123) |
| Median OS, months | 9.80 | 16.80 | 16.24 | 9.80 | 15.40 | 16.01 |
| HR (95% CI)a | — | 0.289  (0.151-0.554) | 0.275  (0.147-0.514) | — | 0.352  (0.161-0.768) | 0.323  (0.156-0.668) |
| **Abbreviations:** CTC, circulating tumor cell; HR, hazard ratio; ORR, overall response rate; OS, overall survival; PFS, progression-free survival.  a vs Group 1 (+ + +). | | | | | | |

**Table S6** Efficacy outcomes by absence or presence of circulating tumor cells (CTC) at baseline in the analyses of patients with CTC levels ≥ 2 and ≥ 5

| **Outcome** | **2-CTC Analysis** | | **5-CTC Analysis** | |
| --- | --- | --- | --- | --- |
| **< 2 CTCs** | **≥ 2 CTCs** | **< 5 CTCs** | **≥ 5 CTCs** |
| ORR, n (%) | 33 (47.8) | 39 (65.0) | 42 (48.3) | 30 (68.2) |
| Median PFS, months | 6.02 | 7.00 | 6.51 | 7.43 |
| HR (95% CI) | 1.276 (0.840-1.939) | | 1.287 (0.830-1.995) | |
| Median OS, months | 16.24 | 13.02 | 16.01 | 13.02 |
| HR (95% CI) | 0.732 (0.476-1.123) | | 0.761 (0.492-1.177) | |
| **Abbreviations:** CTC, circulating tumor cell; HR, hazard ratio; ORR, overall response rate; OS, overall survival; PFS, progression-free survival. | | | | |

**Table S7** PFS by treatment arm and change in circulating tumor cell (CTC) levels from baseline in the analyses of patients with CTC levels ≥ 2 and ≥ 5

| **Treatment** | **CTC Group** | **≥ 2-CTC Analysis** | | **≥ 5-CTC Analysis** | |
| --- | --- | --- | --- | --- | --- |
| **n** | **Median PFS, months** | **n** | **Median PFS, months** |
| ***nab*-P/C** | **1 (+ + +)** | 1 | NA | 0 | NA |
| **2 (+ ± ±)** | 22 | 10.62 | 16 | 8.94 |
| **3 (−)** | 22 | 6.51 | 30 | 8.32 |
| ***nab*-P/G** | **1 (+ + +)** | 8 | 4.24 | 5 | 5.19 |
| **2 (+ ± ±)** | 8 | 6.90 | 7 | 8.38 |
| **3 (−)** | 26 | 6.97 | 30 | 5.82 |
| **G/C** | **1 (+ + +)** | 7 | 4.70 | 5 | 4.70 |
| **2 (+ ± ±)** | 14 | 7.00 | 11 | 11.87 |
| **3 (−)** | 21 | 6.02 | 27 | 5.79 |
| **Abbreviations:** C, carboplatin; CTC, circulating tumor cell; G, gemcitabine; *nab*-P, *nab*-paclitaxel; NA, not applicable; PFS, progression-free survival. | | | | | |
